# Supplementary figures and images for: Identification of marker proteins of muscular dystrophy in the urine proteome from the mdx-4cv model of dystrophinopathy
Source: Royal Society of Chemistry journal article supplement (doi:10.1039/c9mo00182d), 2020-03-18

**FN1**

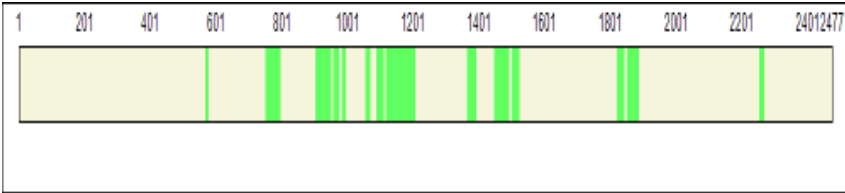

**NID1**

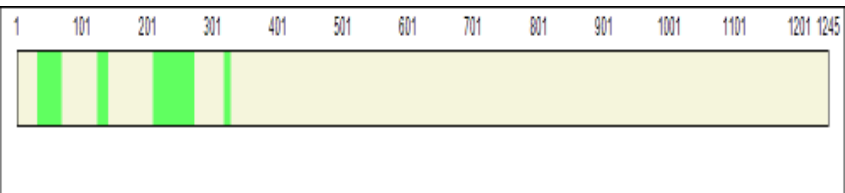

**CDH13**

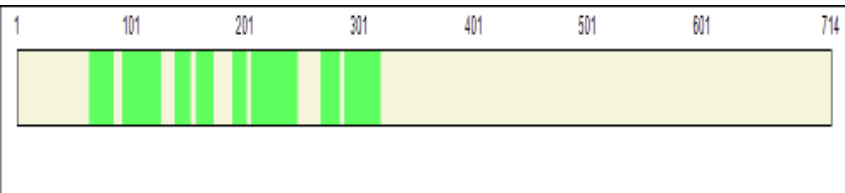

**NID2**

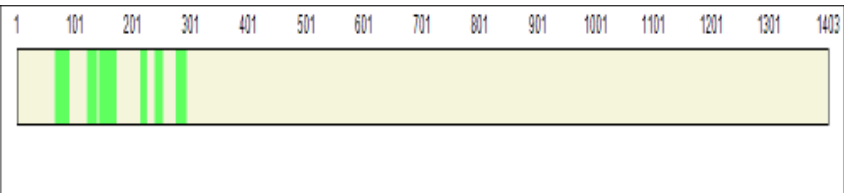

**ANG  
PTL2**

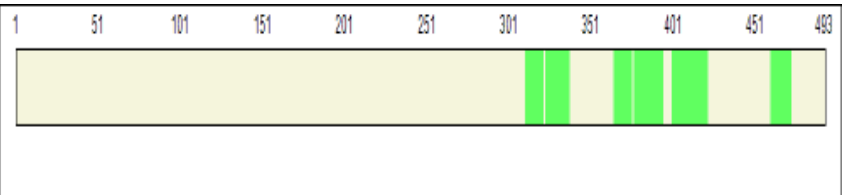

**BIN1**

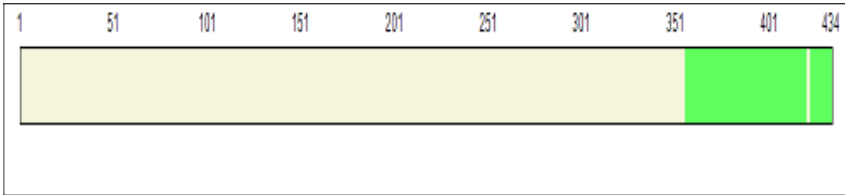

Supplement: c9mo00182d2.pdf [file c9mo00182d2.pdf]
